# Supplementary material for: Neonatal Vitamin D and Associations with Longitudinal Changes of Eczema up to 25 Years of Age
Source: MDPI journal article supplement (doi:10.3390/nu16091303), 2024-04-26
Supplement: s1 [file s1]

## Supplementary Materials

### Figures

Figure S1 Directed acyclic graph (DAG) for Model 1

Figure S2 Directed acyclic graph (DAG) for Model 2

Figure S3 Eczema phenotype from birth to 25 years old in the MACS cohort (Four classes)

### Tables

Table S1 The selection of the best-fitting model from latent class analyses

Table S2 Comparison of basic characteristics of participants with and without neonatal vitamin D measurement

Table S3 The distribution of vitamin D by seasons

Table S4 The association between neonatal vitamin D and prevalent eczema from birth to 25 years of age stratified by maternal prenatal smoking

Table S5 The associations between neonatal vitamin D and longitudinal eczema phenotype from birth to 12 years of age stratified by mother's birthplace

Table S6 The associations between neonatal vitamin D and longitudinal eczema phenotype from birth to 25 years of age stratified by mother's birthplace

Table S7 The associations between neonatal vitamin D and longitudinal eczema phenotype from birth to 25 years of age stratified by maternal smoking during pregnancy

Table S8 The associations between neonatal vitamin D and longitudinal eczema phenotype from birth to 25 years of age stratified by paternal education level

Table S9 The association between neonatal vitamin D and eczema/sensitisation phenotype

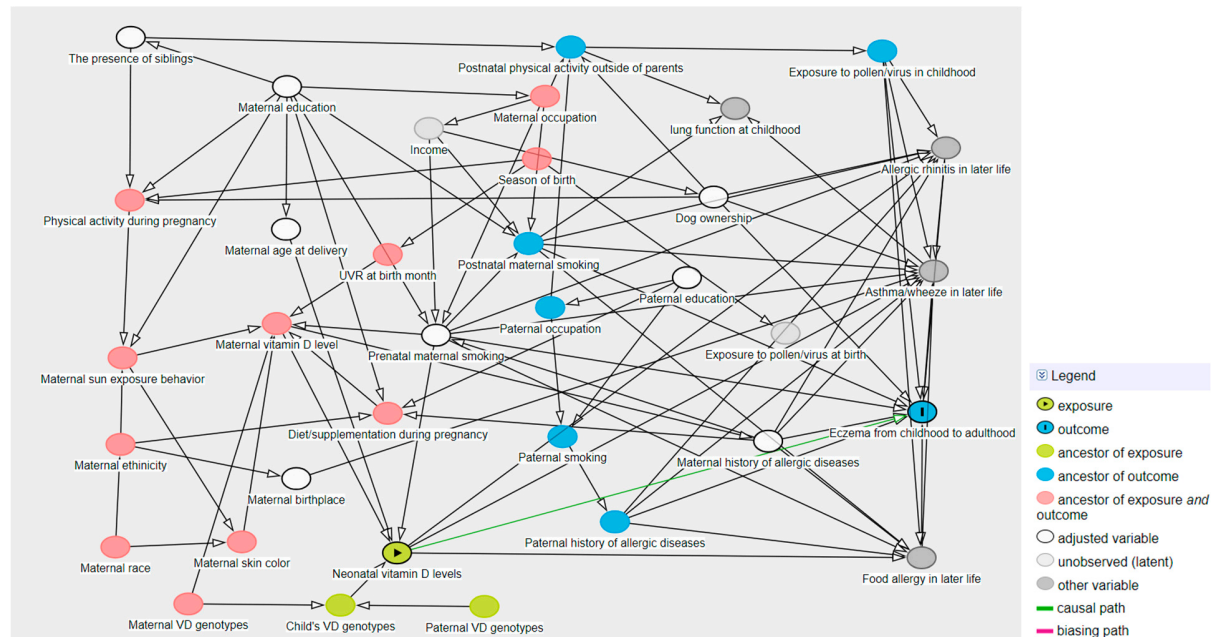

**Figure S1** Directed acyclic graph (DAG) for model 1. The exposure is neonatal vitamin D levels and the outcome in this study focused on eczema from childhood to early adulthood. The minimum set of adjustable variables was dog ownership (having dog vs. no dogs), maternal eczema history, mother's age when delivery, maternal smoking during pregnancy, the presence of any siblings, maternal birthplace, maternal and paternal education, as they may impact both neonatal vitamin D levels and eczema outcomes in children.

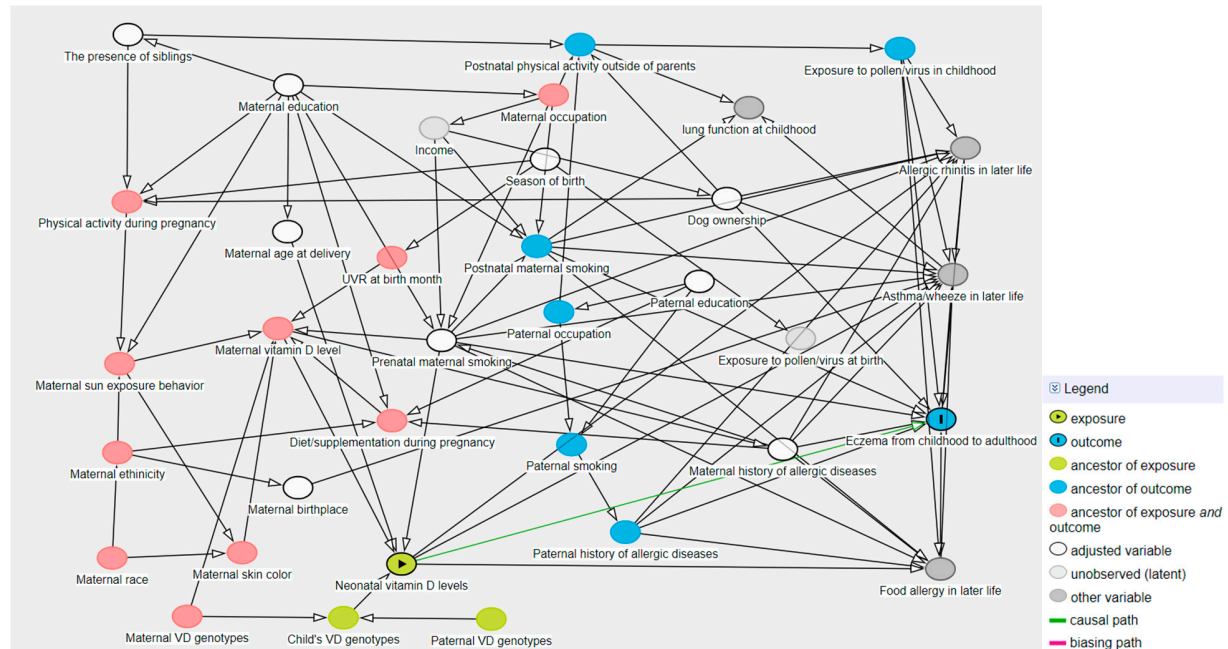

**Figure S2** Directed acyclic graph (contested DAG) for Model 2. Adjustable variables are all the adjusted variables in Figure S1 and the **season of birth**.

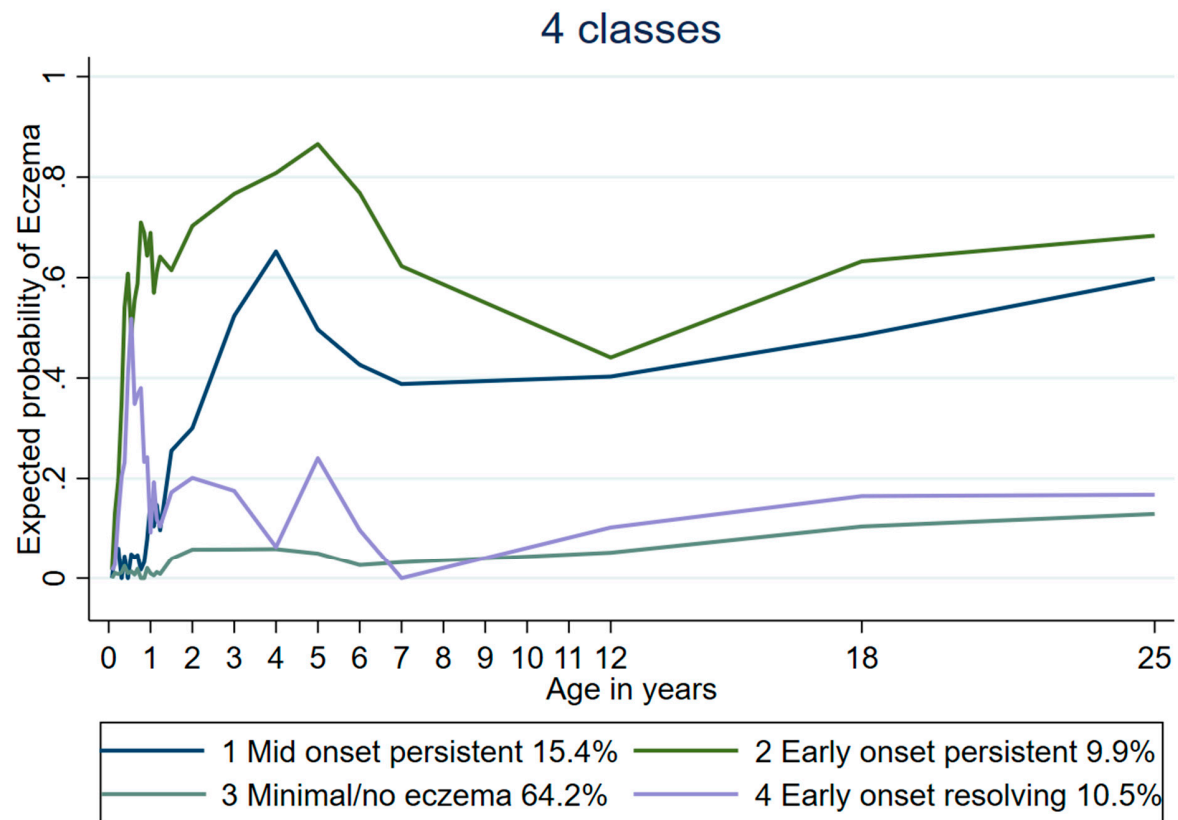

**Figure S3** Eczema phenotype from birth to 25 years old in the MACS cohort (Four classes)

**Table S1** The selection of the best-fitting model from latent class analyses

| Classes Number | Entropy value | Smallest class portion | AIC  | BIC         |
|----------------|---------------|------------------------|------|-------------|
| 2 classes      | 0.94          | 0.18                   | 7998 | 8233        |
| 3 classes      | 0.82          | 0.15                   | 7790 | 8140        |
| 4 classes      | <b>0.87</b>   | <b>0.10</b>            | 7620 | <b>8067</b> |
| 5 classes      | 0.86          | 0.08                   | 7577 | 8091        |
| 6 classes      | 0.78          | 0.06                   | 7561 | 8150        |

**Table S2** Comparison of basic characteristics of participants with (224) and without (396) neonatal vitamin D measurement

| Characteristics                | Sample without a measurement (n=396) | Sample with measurement (n=224 <sup>†</sup> ) | P value |
|--------------------------------|--------------------------------------|-----------------------------------------------|---------|
| <b>Baseline</b>                |                                      |                                               |         |
| Maternal age (y), mean±SD      | 30.9±4.4                             | 31.8±4.3                                      | 0.026   |
| Maternal birthplace            |                                      |                                               | 0.688   |
| Australia/New Zealand          | 86.4                                 | 87.5                                          |         |
| Others                         | 13.6                                 | 12.5                                          |         |
| Dog ownership (%)              |                                      |                                               | 0.147   |
| Yes                            | 32.6                                 | 26.8                                          |         |
| No                             | 65.7                                 | 69.6                                          |         |
| Unknown                        | 1.7                                  | 3.6                                           |         |
| Maternal eczema-Yes (%)        | 41.0                                 | 35.3                                          | 0.159   |
| Maternal food allergy -Yes (%) | 38.4                                 | 38.8                                          | 0.911   |
| Maternal hay fever-Yes (%)     | 61.0                                 | 59.8                                          | 0.771   |
| Maternal asthma-Yes (%)        | 44.8                                 | 40.6                                          | 0.313   |
| Paternal eczema -Yes (%)       | 19.2                                 | 22.8                                          | 0.289   |
| Paternal food allergy -Yes (%) | 21.5                                 | 21.0                                          | 0.884   |
| Paternal hay fever-Yes (%)     | 45.5                                 | 47.3                                          | 0.667   |
| Paternal asthma-Yes (%)        | 26.6                                 | 24.1                                          | 0.496   |
| Maternal educational level (%) |                                      |                                               | 0.097   |
| Primary school or less         | 0.3                                  | 0                                             |         |
| Secondary school               | 43.9                                 | 35.7                                          |         |
| University degree or higher    | 55.8                                 | 64.3                                          |         |
| Paternal educational level (%) |                                      |                                               | <0.001  |
| Secondary school               | 44.8                                 | 28.1                                          |         |
| University degree or higher    | 55.2                                 | 71.9                                          |         |
| Smoking during pregnancy (%)   |                                      |                                               | 0.007   |
| Ever                           | 28.6                                 | 18.8                                          |         |
| Never                          | 71.4                                 | 81.2                                          |         |
| Older siblings (%)             |                                      |                                               | 0.134   |
| 0                              | 37.6                                 | 44.7                                          |         |
| 1-2                            | 54.8                                 | 46.4                                          |         |

|                          |          |                                                                      |                                                                   |                |
|--------------------------|----------|----------------------------------------------------------------------|-------------------------------------------------------------------|----------------|
|                          | ≥3       | 7.6                                                                  | 8.9                                                               |                |
| Sex of newborn (%)       |          |                                                                      |                                                                   | 0.928          |
|                          | Female   | 49.3                                                                 | 49.8                                                              |                |
|                          | Male     | 50.7                                                                 | 50.2                                                              |                |
| Birthweight (g), mean±SD |          | 3469±525                                                             | 3467±509                                                          | 0.984          |
| Season of birth (%)      |          |                                                                      |                                                                   | 0.437          |
|                          | Spring   | 29.6                                                                 | 26.3                                                              |                |
|                          | Summer   | 21.2                                                                 | 19.2                                                              |                |
|                          | Autumn   | 21.2                                                                 | 26.8                                                              |                |
|                          | Winter   | 28.0                                                                 | 27.7                                                              |                |
| <b>Eczema age</b>        |          | <b>Eczema prevalence in samples without vitamin D measures (n/N)</b> | <b>Eczema prevalence in samples with vitamin D measures (n/N)</b> | <b>P value</b> |
|                          | 1-year   | 148/395 (37.47%)                                                     | 70/224 (31.25%)                                                   | 0.120          |
|                          | 2-years  | 115/373 (30.83%)                                                     | 64/222 (28.83%)                                                   | 0.607          |
|                          | 6-years  | 37/266 (13.91%)                                                      | 26/176 (14.77%)                                                   | 0.799          |
|                          | 12-years | 29/204 (14.22%)                                                      | 25/157 (15.92%)                                                   | 0.652          |
|                          | 18-years | 42/209 (20.10%)                                                      | 47/198 (23.74%)                                                   | 0.374          |
|                          | 25-years | 39/143 (27.27%)                                                      | 32/123 (26.02%)                                                   | 0.817          |

<sup>†</sup> There was one observation with the 25(OH)D value as 0 (ID=83) that was also included in the table.

<sup>‡</sup> Chi-squared tests were used to test the difference between the groups with/without vitamin D measures.

**Table S3** The distribution of 25(OH)D3 by the season of birth

| Season of birth                          | Mean (sd, nmol/L) | Median (nmol/L) | P25 (nmol/L) | P75 (nmol/L) | Total (n=) |
|------------------------------------------|-------------------|-----------------|--------------|--------------|------------|
| <b>Spring</b><br>(September to November) | 31.4 (16.4)       | 28.6            | 20.9         | 39.8         | 58         |
| <b>Summer</b><br>(December to February)  | 47.5 (19.5)       | 45.1            | 32.9         | 60.6         | 43         |
| <b>Autumn</b><br>(March to May)          | 42.1 (19.4)       | 39.3            | 28.5         | 53.3         | 60         |
| <b>Winter</b><br>(June to August)        | 26.5 (12.7)       | 22.9            | 16.9         | 34.4         | 62         |
| Total                                    | 35.7 (18.7)       | 32.5            | 21.6         | 44.7         | 223        |

**Table S4** The association between neonatal vitamin D and prevalent eczema from birth to 25 years of age stratified by maternal prenatal smoking

| Eczema age                         | Ever maternal smoking (n=42) |              | Never maternal smoking (n=181) |         | p-value of the interaction with the mother smoking |
|------------------------------------|------------------------------|--------------|--------------------------------|---------|----------------------------------------------------|
|                                    | OR (95%CI) <sup>†</sup>      | p-value      | OR (95%CI) <sup>†</sup>        | p-value |                                                    |
| 0-1y<br>(n/N <sup>‡</sup> =70/220) | 0.99 (0.84-1.19)             | 0.990        | 1.46 (0.95-2.23)               | 0.083   | <b>0.11</b>                                        |
| 1-2y<br>(n/N=63/214)               | <b>0.78 (0.63-0.96)</b>      | <b>0.021</b> | 1.33 (0.85-2.08)               | 0.214   | <b>0.04</b>                                        |
| 6-y (n/N=26/174)                   | 0.86 (0.65-1.13)             | 0.280        | 0.93 (0.50-1.72)               | 0.807   | 0.82                                               |
| 12-y<br>(n/N=25/155)               | 0.83 (0.61-1.13)             | 0.245        | 1.26 (0.72-2.22)               | 0.424   | 0.22                                               |
| 18-y<br>(n/N=47/196)               | 1.09 (0.88-1.34)             | 0.427        | 0.77 (0.46-1.32)               | 0.349   | 0.25                                               |
| 25-y<br>(n/N=32/122)               | 0.93 (0.72-1.20)             | 0.566        | 1.04 (0.54-2.01)               | 0.898   | 0.74                                               |
| 1y-25y (n=222)                     | 0.92 (0.81-1.05)             | 0.205        | 1.12 (0.84-1.48)               | 0.456   | <b>0.09</b>                                        |

<sup>†</sup> This analysis model was adjusted for dog ownership, maternal eczema history, mother's age when delivery, mother's birthplace, maternal education, and paternal education.

<sup>‡</sup> N: The total number of participants with vitamin D and eczema outcomes. n: of these, the number who had eczema.



**Table S5** The associations between neonatal vitamin D and longitudinal eczema phenotype from birth to 12 years of age stratified by mother's birthplace

| Eczema subclasses                                 | Mother born in Australia/New Zealand(n=195) |         | Mother born out of Australia/New Zealand(n=28) |              | P-value of interaction with mother's birthplace |
|---------------------------------------------------|---------------------------------------------|---------|------------------------------------------------|--------------|-------------------------------------------------|
|                                                   | aMOR (95%CI) <sup>§</sup>                   | p-value | aMOR (95%CI) <sup>§</sup>                      | p-value      |                                                 |
| Early-onset-persistent (n/N <sup>‡</sup> =22/223) | 0.82 (0.63-1.07)                            | 0.151   | <b>0.27 (0.11-0.68)</b>                        | <b>0.005</b> | <b>0.02</b>                                     |
| Early-onset-resolving (n/N=18/223)                | 1.33 (1.06-1.68)                            | 0.014   | 1.04 (0.59-1.83)                               | 0.880        | 0.43                                            |
| Mid-onset-persistent (n/N=25/223)                 | 0.96 (0.76-1.20)                            | 0.693   | 1.07 (0.63-1.82)                               | 0.794        | 0.69                                            |
| Mid-onset-resolving (n/N=4/223)                   | 0.80 (0.45-1.41)                            | 0.441   | <b>0.02 (0.001-0.56)</b>                       | <b>0.020</b> | <b>0.05</b>                                     |
| Minimal/no eczema (n/N=154/223)                   | 1.00 (Reference)                            | -       | 1.00 (Reference)                               | -            | Reference                                       |

<sup>†</sup> The analysis was Adjusted for the mother's age when gave birth, the presence of siblings, maternal prenatal smoking, dog ownership, maternal eczema history, maternal education, and paternal education.

<sup>‡</sup> N: The total number of participants with vitamin D and eczema outcomes. n: of these, the number in each eczema subclass.

<sup>§</sup> aMOR: Adjusted multinomial OR.

**Table S6** The associations between neonatal vitamin D and longitudinal eczema phenotype from birth to 25 years of age stratified by mother's birthplace

| Eczema subclasses                                    | Born in<br>Australia/New Zealand (n=195) |         | Born outside<br>Australia/New Zealand (n=28) |              | Interaction<br>P-value |
|------------------------------------------------------|------------------------------------------|---------|----------------------------------------------|--------------|------------------------|
|                                                      | aMOR (95%CI) <sup>§</sup>                | p-value | aMOR (95%CI) <sup>§</sup>                    | p-value      |                        |
| Early-onset-persistent<br>(n/N <sup>‡</sup> =21/223) | 0.84 (0.64-1.10)                         | 0.206   | <b>0.33 (0.15-0.71)</b>                      | <b>0.004</b> | <b>0.021</b>           |
| Early-onset-resolving<br>(n/N=20/223)                | 1.23 (0.98-1.55)                         | 0.075   | 0.70 (0.27-1.79)                             | 0.452        | 0.246                  |
| Mid-onset-persistent<br>(n/N=31/223)                 | 1.01 (0.81-1.26)                         | 0.918   | 1.12 (0.66-1.91)                             | 0.670        | 0.730                  |
| Minimal/no eczema<br>(n/N=151/223)                   | -                                        | -       | -                                            | -            | -                      |

<sup>†</sup> The analysis was Adjusted for the mother's age when gave birth, the presence of siblings, maternal prenatal smoking, dog ownership, maternal eczema history, maternal education, and paternal education.

<sup>‡</sup> N: The total number of participants with vitamin D and eczema outcomes. n: of these, the number in each eczema subclass.

<sup>§</sup> aMOR: Adjusted multinomial OR.

**Table S7** The associations between neonatal vitamin D and longitudinal eczema phenotype from birth to 25 years of age stratified by maternal smoking during pregnancy

| Eczema subclasses                              | Ever maternal smoking<br>(n=42) |              | Never maternal smoking<br>(n=181) |         | Interaction<br>P-value |
|------------------------------------------------|---------------------------------|--------------|-----------------------------------|---------|------------------------|
|                                                | aMOR (95%CI) <sup>§</sup>       | p-value      | aMOR (95%CI) <sup>§</sup>         | p-value |                        |
| Early-onset-persistent<br>(n <sup>‡</sup> =21) | 0.36 (0.80-1.64)                | 0.189        | 0.77 (0.59-1.02)                  | 0.065   | 0.332                  |
| Early-onset-resolving<br>(n=20)                | 1.67 (1.08-2.59)                | 0.021        | 1.15 (0.88-1.49)                  | 0.314   | 0.147                  |
| Mid-onset-persistent<br>(n=31)                 | <b>1.43 (1.01-2.04)</b>         | <b>0.046</b> | 0.97 (0.76-1.24)                  | 0.812   | <b>0.079</b>           |
| Minimal/no eczema<br>(n=151)                   | -                               | -            | -                                 | -       | -                      |

<sup>†</sup> The analysis was Adjusted for the mother's age when gave birth, the presence of siblings, maternal prenatal smoking, dog ownership, maternal eczema history, maternal education, and paternal education.

<sup>‡</sup> N: The total number of participants with vitamin D and eczema outcomes. n: of these, the number in each eczema subclass.

<sup>§</sup> aMOR: Adjusted multinominal OR.

**Table S8** The associations between neonatal vitamin D and longitudinal eczema phenotype from birth to 25 years of age stratified by paternal education level

| Eczema subclasses                                    | Paternal education $\geq$ Y15<br>(n=161) |         | Paternal education<Y15<br>(n=62) |              | Interaction<br>P-value |
|------------------------------------------------------|------------------------------------------|---------|----------------------------------|--------------|------------------------|
|                                                      | aMOR (95%CI) <sup>§</sup>                | p-value | aMOR (95%CI) <sup>§</sup>        | p-value      |                        |
| Early-onset-persistent<br>(n/N <sup>‡</sup> =21/223) | 0.95 (0.73-1.23)                         | 0.680   | <b>1.43 (1.01-2.03)</b>          | <b>0.045</b> | <b>0.062</b>           |
| Early-onset-resolving<br>(n/N=20/223)                | 0.82 (0.64-1.04)                         | 0.106   | 0.32 (0.40-2.27)                 | 0.245        | 0.338                  |
| Mid-onset-persistent<br>(n/N=31/223)                 | 1.16 (0.90-1.50)                         | 0.245   | 1.26 (0.66-2.41)                 | 0.484        | 0.824                  |
| Minimal/no eczema<br>(n/N=151/223)                   | -                                        | -       | -                                | -            | -                      |

<sup>†</sup> The analysis was Adjusted for the mother's age when gave birth, the presence of siblings, maternal prenatal smoking, dog ownership, maternal eczema history, maternal education, and paternal education.

<sup>‡</sup> N: The total number of participants with vitamin D and eczema outcomes. n: of these, the number in each eczema subclass.

<sup>§</sup> aMOR: Adjusted multinominal OR.

**Table S9** The association between neonatal vitamin D and eczema/sensitisation phenotype

| Age       | Eczema/sensitisation subclasses | Unadjusted Model         |         | Model 1 <sup>†</sup>      |         | N <sup>‡</sup> |
|-----------|---------------------------------|--------------------------|---------|---------------------------|---------|----------------|
|           |                                 | MOR (95%CI) <sup>§</sup> | p-value | aMOR (95%CI) <sup>§</sup> | p-value |                |
| 6 months  | Atopic eczema (n=12)            | 0.99 (0.71-1.37)         | 0.930   | 0.86 (0.60-1.24)          | 0.426   | 203            |
|           | Non-atopic eczema (n=34)        | 1.09 (0.90-1.33)         | 0.366   | 1.13 (0.92-1.39)          | 0.229   |                |
|           | Asymptomatic sensitized (n=30)  | 1.11 (0.91-1.36)         | 0.292   | 1.11 (0.89-1.38)          | 0.354   |                |
|           | Asymptomatic (n=127)            | Reference group          | -       | Reference group           | -       |                |
| 12 months | Atopic eczema (n=27)            | 1.02 (0.82-1.27)         | 0.884   | 0.97 (0.77-1.23)          | 0.819   | 209            |
|           | Non-atopic eczema (n=39)        | 1.03 (0.85-1.24)         | 0.795   | 1.04 (0.85-1.27)          | 0.675   |                |
|           | Asymptomatic sensitized (n=32)  | 0.87 (0.68-1.10)         | 0.229   | 0.84 (0.65-1.09)          | 0.195   |                |
|           | Asymptomatic (n=111)            | Reference group          | -       | Reference group           | -       |                |
| 2 years   | Atopic eczema (n=21)            | 0.88 (0.65-1.18)         | 0.382   | 0.86 (0.64-1.17)          | 0.342   | 179            |
|           | Non-atopic eczema (n=27)        | 0.92 (0.71-1.18)         | 0.503   | 0.93 (0.69-1.24)          | 0.608   |                |
|           | Asymptomatic sensitized (n=40)  | 1.14 (0.94-1.38)         | 0.187   | 1.17 (0.95-1.44)          | 0.148   |                |
|           | Asymptomatic (n=91)             | Reference group          | -       | Reference group           | -       |                |
| 12 years  | Atopic eczema (n=15)            | 0.89 (0.64-1.23)         | 0.465   | 0.90 (0.64-1.26)          | 0.534   | 153            |
|           | Non-atopic eczema (n=10)        | 0.84 (0.56-1.26)         | 0.399   | 0.86 (0.57-1.30)          | 0.470   |                |
|           | Asymptomatic sensitized (n=75)  | 0.96 (0.80-1.16)         | 0.695   | 0.97 (0.79-1.19)          | 0.794   |                |
|           | Asymptomatic (n=53)             | Reference group          | -       | Reference group           | -       |                |
| 18 years  | Atopic eczema (n=34)            | 1.01 (0.80-1.29)         | 0.923   | 1.05 (0.81-1.34)          | 0.726   | 179            |
|           | Non-atopic eczema (n=8)         | 1.21 (0.85-1.73)         | 0.281   | 1.23 (0.83-1.84)          | 0.301   |                |
|           | Asymptomatic sensitized (n=86)  | 1.01 (0.84-1.23)         | 0.881   | 1.02 (0.83-1.25)          | 0.842   |                |
|           | Asymptomatic (n=51)             | Reference group          | -       | Reference group           | -       |                |
| 25 years  | Atopic eczema (n=23)            | 0.87 (0.65-1.18)         | 0.371   | 0.80 (0.57-1.12)          | 0.200   | 104            |
|           | Non-atopic eczema (n=8)         | 1.04 (0.70-1.54)         | 0.862   | 1.18 (0.77-1.83)          | 0.449   |                |
|           | Asymptomatic sensitized (n=35)  | 0.90 (0.70-1.17)         | 0.426   | 0.97 (0.73-1.29)          | 0.844   |                |
|           | Asymptomatic (n=38)             | Reference group          | -       | Reference group           | -       |                |

<sup>†</sup> Adjusted for the mother's age when gave birth, the presence of siblings, maternal prenatal smoking, dog ownership, maternal atopy history, maternal education, and paternal education.

<sup>‡</sup> N: The total number of participants with vitamin D and eczema outcomes. n: of these, the number in each eczema/sensitisation subclass.

<sup>§</sup> MOR: Multinomial OR. aMOR: Adjusted multinomial OR.
